# Supplementary material
Source: Springer Nature journal article supplement (https://www.springermedizin.de/resource/supplementary/12955_2012_1015_MOESM4_ESM.pdf/9558834)

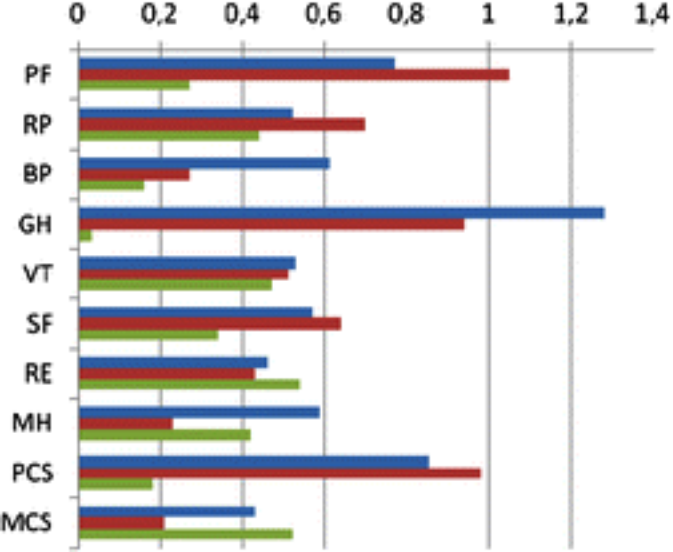

■ CKD 2-3 vs controls  
■ CKD 4 vs CKD 2-3  
■ CKD 5 vs CKD 4

Supplement: MOESM4 [file 9558834]
